# Supplementary material for: Comparing benthic biogeochemistry at a sandy and a muddy site in the Celtic Sea using a model and observations
Source: PubMed Central journal article supplement (PMC6961523; doi:10.1007/s10533-017-0367-0), 2017-09-07
Supplement: 10533_2017_367_MOESM2_ESM.pdf [file 10533_2017_367_MOESM2_ESM.pdf]

# Comparing benthic biogeochemistry at a sandy and a muddy site in the Celtic Sea using a model and observations

Aldridge J.N.<sup>\* 1</sup>, Lessin G.<sup>2</sup>, Amoudry L. O.<sup>5</sup>, Hicks N.<sup>3</sup>, Hull T.<sup>1</sup>, Klar J.<sup>4</sup>, Kitidis V.<sup>2</sup>, McNeill C.L.<sup>2</sup>, Ingels J.<sup>6</sup>, Parker R.<sup>1</sup>, Silburn B.<sup>1</sup>, Silva T.<sup>1</sup>, Sivyer D. B.<sup>1</sup>, Smith H.<sup>4</sup>, Widdicombe S.<sup>2</sup>, Woodward E.M.S.<sup>2</sup>, van der Molen J.<sup>1</sup>, Garcia L.<sup>1</sup>, Kroeger S.<sup>1</sup>

Online Resource 2: Alternative plots of faunal and bacterial data and model comparison.

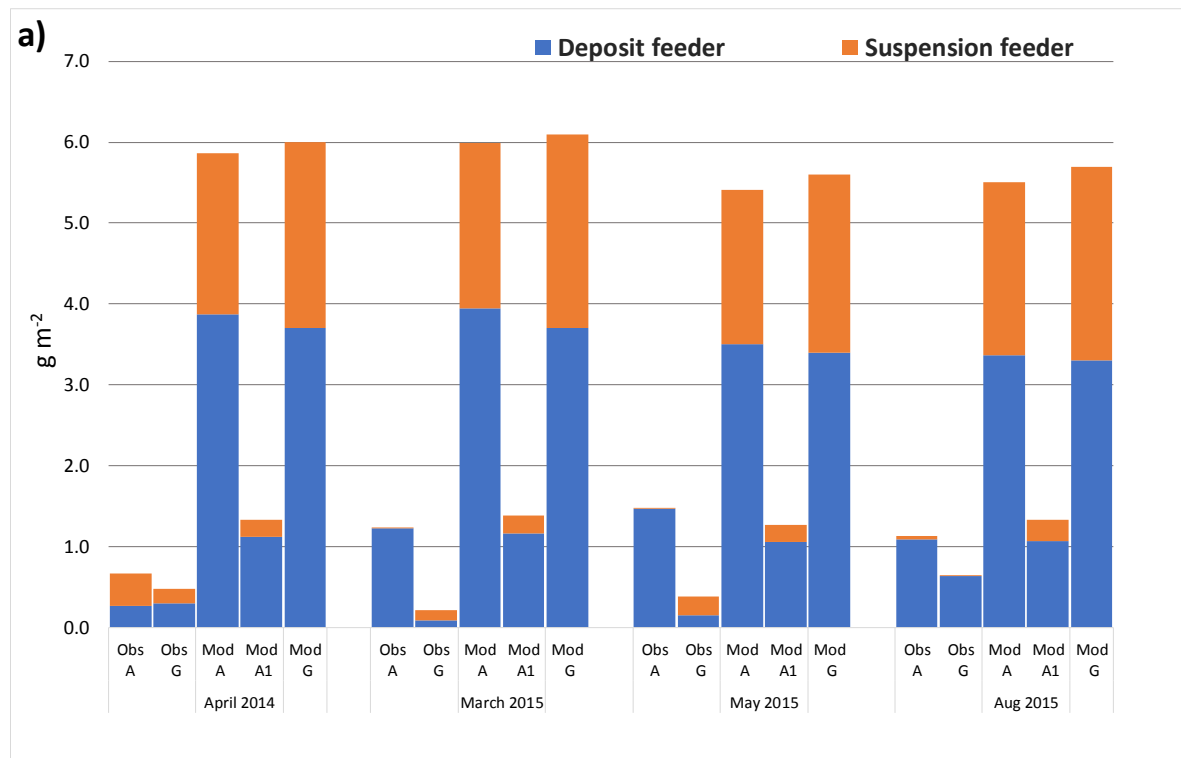

Figure a: Benthic macrofauna model-data comparison at sites A and G. Observations replicate means (5 samples).

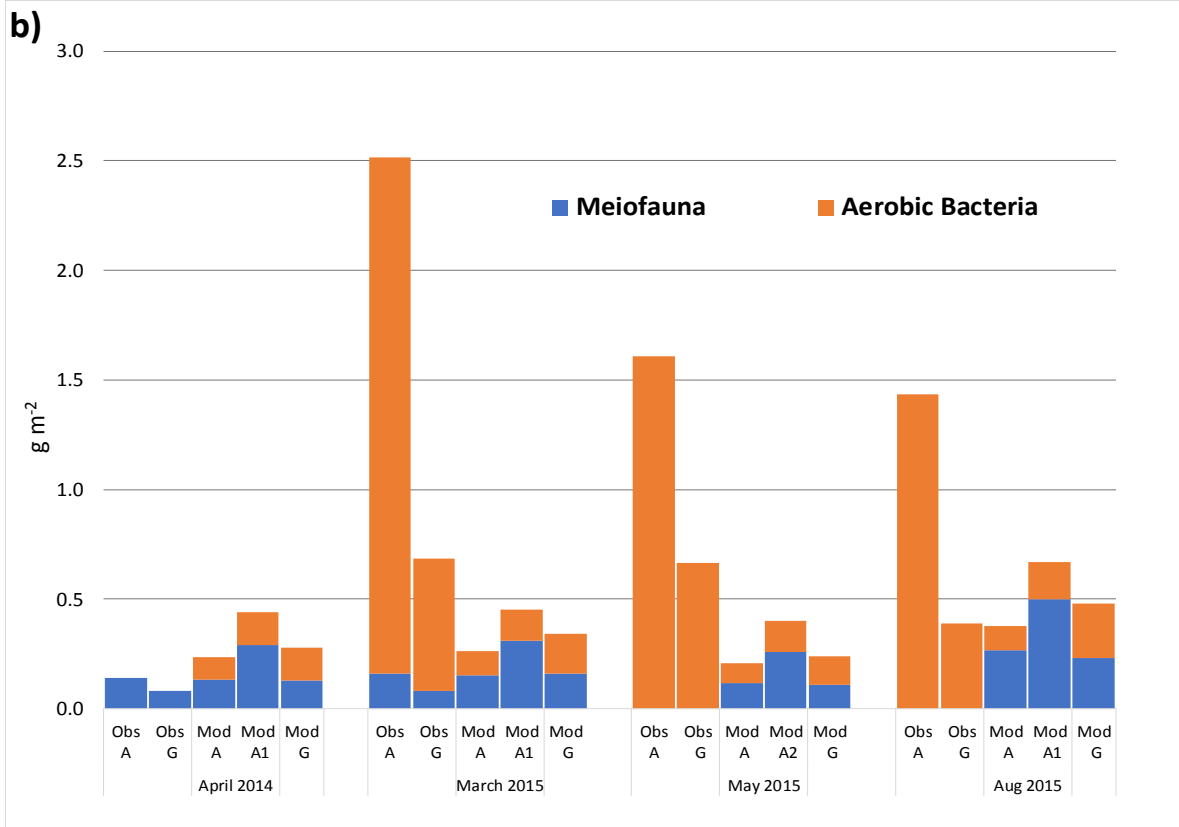

Figure b: Meiofaunal and aerobic bacteria biomass ( $\text{g C m}^{-2}$ ) model-data comparison at sites A and G. Observations replicate means (5 samples).
